# Supplementary material
Source: PubMed Central journal article supplement (PMC31200)
Supplement: pnas_061445598_2.pdf [file pnas_061445598_2.pdf]

**Table 1.** General health, home cage observations, and neurological reflexes in galanin-overexpressing transgenic mice (GAL-tg) and wild type littermate control mice (WT)

|                                        | WT        | GAL-tg    |
|----------------------------------------|-----------|-----------|
| <b><i>Physical characteristics</i></b> |           |           |
| Body weight at 8 months (g)            | 31.1 ±1.1 | 29.4 ±0.9 |
| Core body temperature (OC)             | 35.3 ±0.2 | 35.2 ±0.2 |
| % Displaying missing whiskers          | 28        | 14        |
| % Showing bald patches                 | 7         | 8         |
| % Survival rate at 24 months           | 77        | 68        |
| <b><i>Home cage observations</i></b>   |           |           |
| % Showing wild running                 | 0         | 0         |
| % Showing spontaneous freezing         | 0         | 0         |
| % Showing stereotypies                 | 0         | 0         |
| % Showing nest building                | 100       | 100       |
| <b><i>Neurological reflexes</i></b>    |           |           |
| % Showing righting reflex              | 100       | 100       |
| % Showing eye blink response           | 100       | 100       |
| % Showing ear twitch response          | 100       | 100       |
| % Showing whisker twitch response      | 100       | 100       |

There were no significant differences between genotypes. Data are presented as means ± standard errors of the means.
